# Supplementary material
Source: publisher figshare collection journal article supplement (https://springernature.figshare.com/ndownloader/files/21101859)
Supplement: Supplementary file [file 21101859]

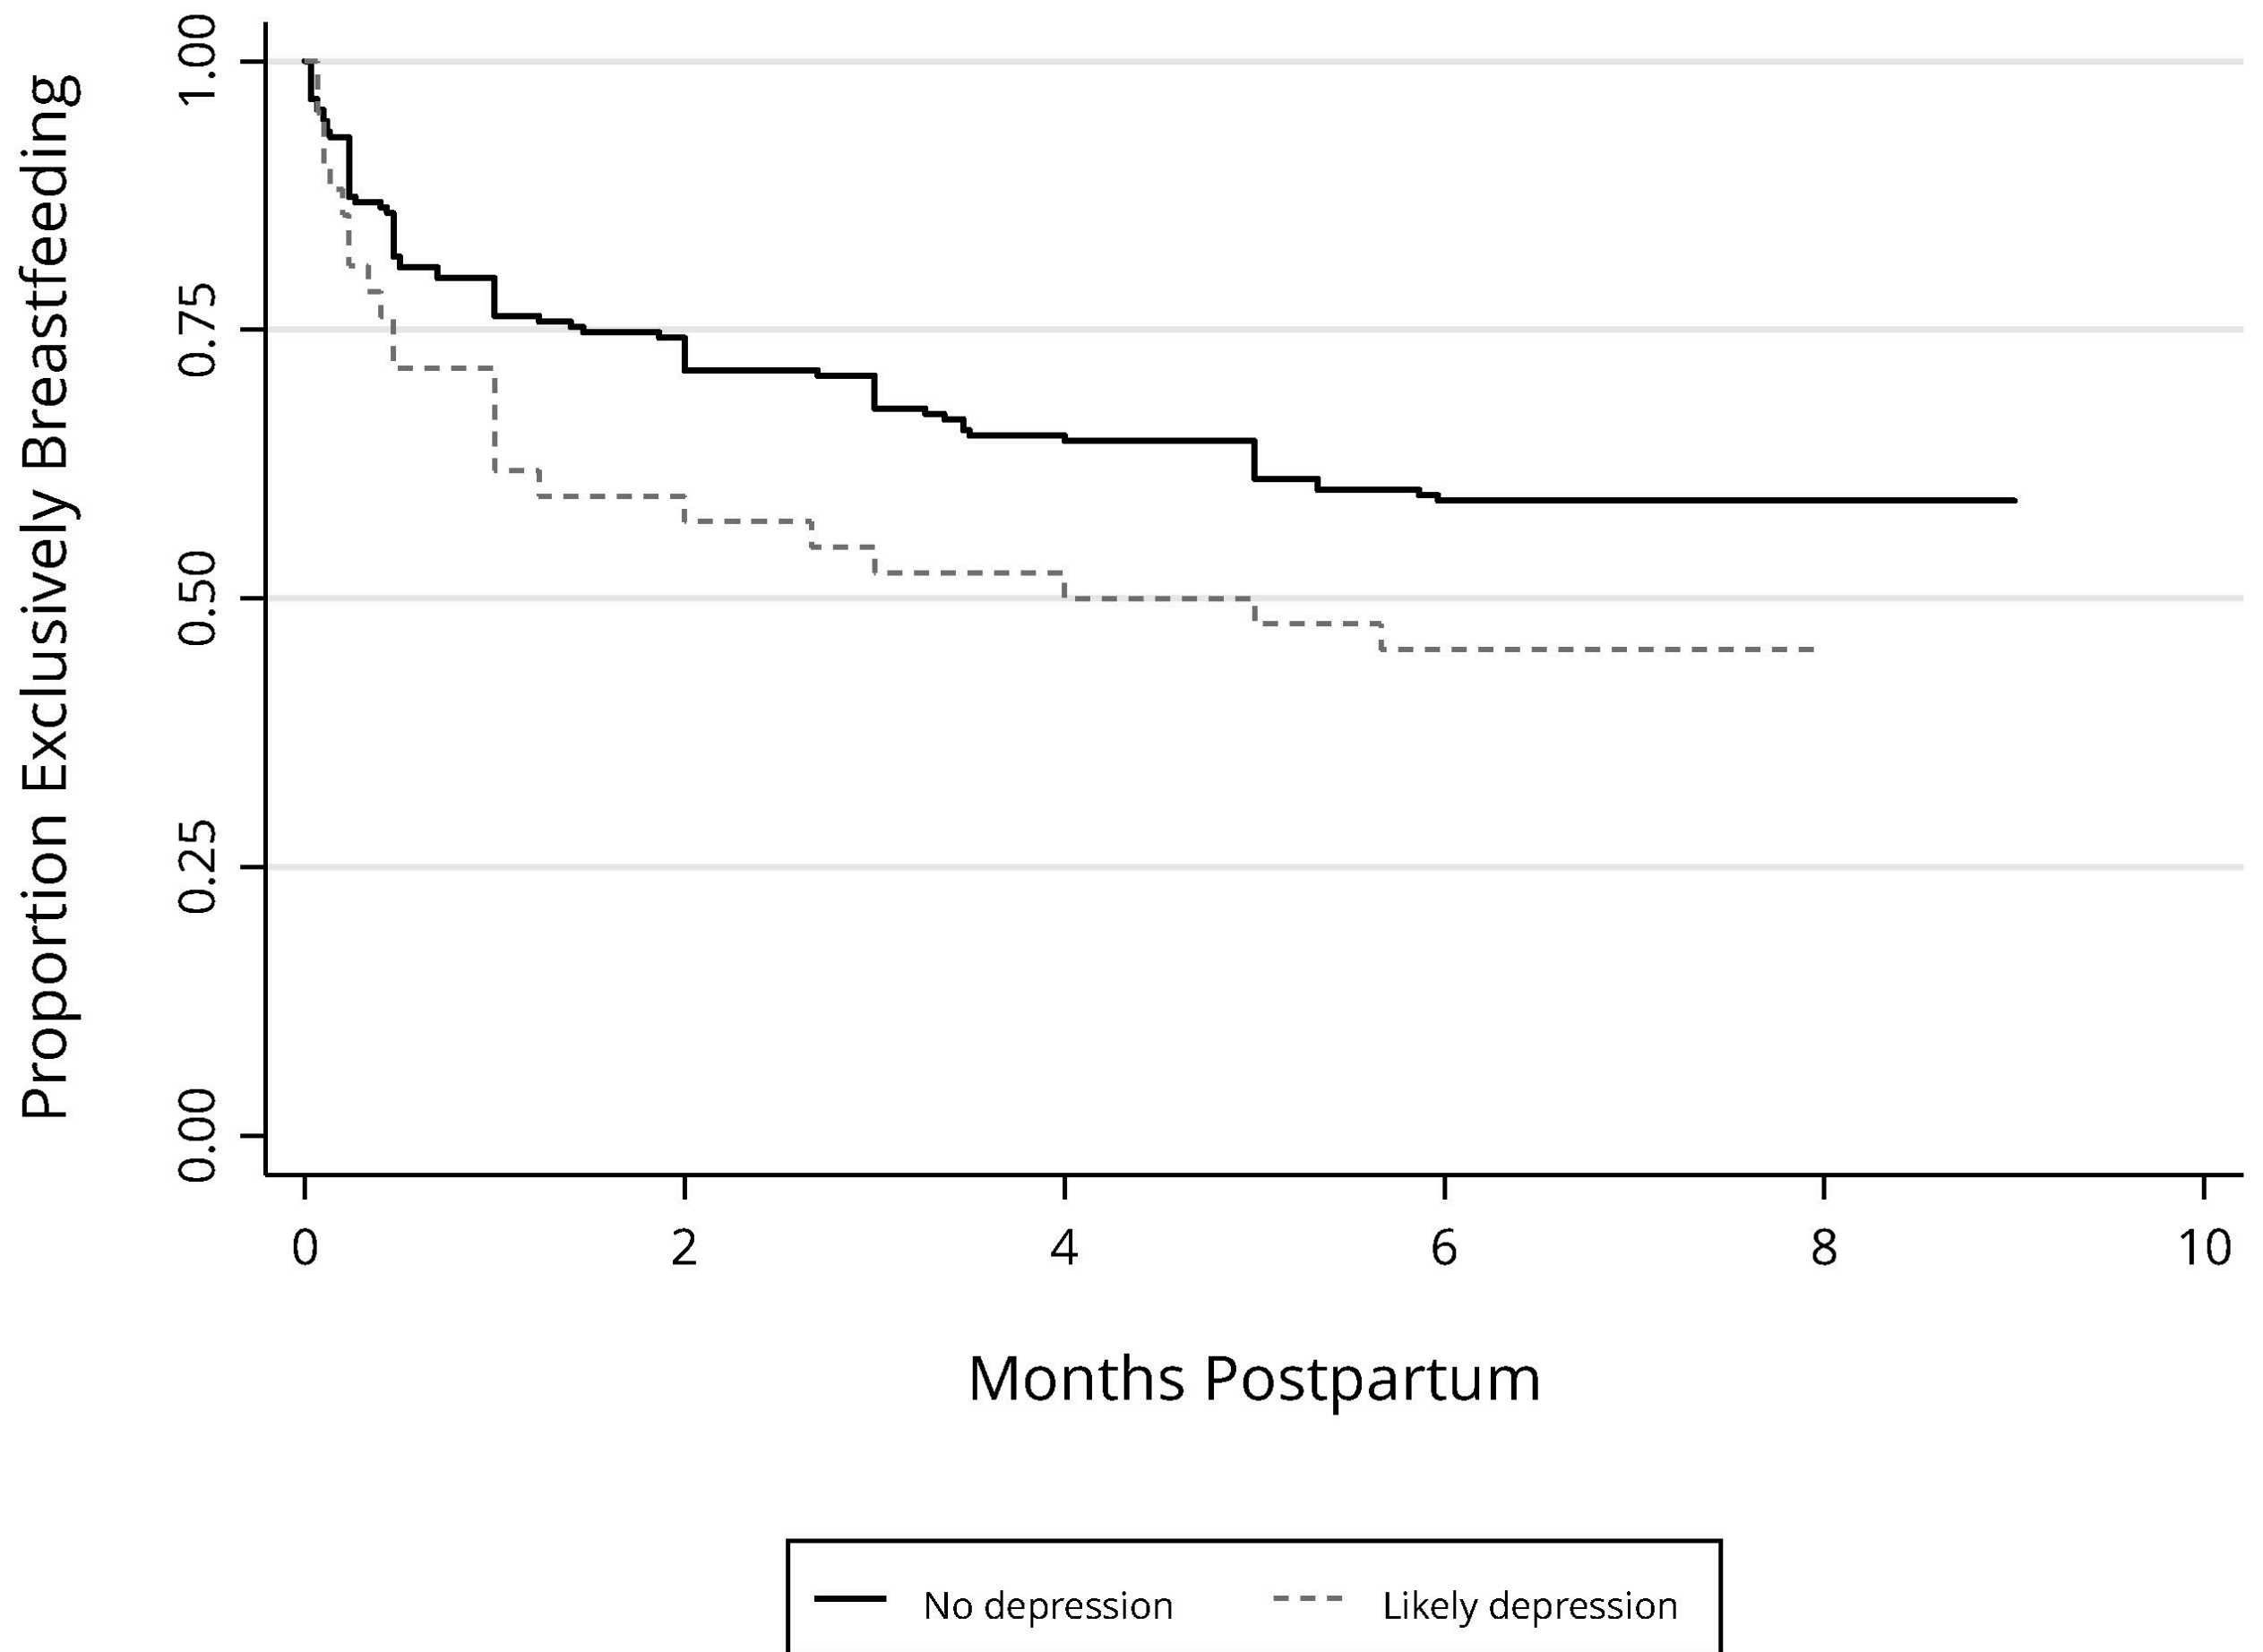

**Supplementary Figure 2.** Proportion of women (n=275) exclusively breastfeeding through 9 months postpartum, by probable depression. The likelihood of early exclusive breastfeeding cessation doubled (HR: 200%) for those experiencing probable depression.
